# Supplementary material for: Luminescence dating approaches to reconstruct the formation of plaggic anthrosols
Source: Copernicus journal article supplement (doi:10.5194/egusphere-2023-2471), 2023-11-08

## Supplementary Material A. Luminescence dating protocols

### Supplementary Material A.1: Luminescence dating protocol used for small-aliquot quartz OSL measurements.

| Step    | Action                                                             | Measured |
|---------|--------------------------------------------------------------------|----------|
| 1       | Beta dose (or Natural dose)                                        |          |
| 2       | 10s preheat to 200°C                                               |          |
| 3       | 20s blue stimulation at 125 °C                                     | Ln/Li    |
| 4       | Beta test dose                                                     |          |
| 5       | 10s cutheat to 180°C                                               |          |
| 6       | 20s blue stimulation at 125 °C                                     | Tn/Ti    |
| 7       | 40s blue bleach at 210°C                                           |          |
| 8       | Repeat step 1-7 for a range of doses (incl. zero and repeat dose)  |          |
| Extra 1 | Repeat step 1-7 with added infrared bleach at 30°C prior to step 3 |          |

### Supplementary Material A.2: Luminescence dating protocol used for single-grain feldspar pIRIR measurements.

| Step | Action                                                             | Measured                        |
|------|--------------------------------------------------------------------|---------------------------------|
| 1    | Beta dose (or Natural dose)                                        |                                 |
| 2    | 120s preheat to 200°C                                              |                                 |
| 3    | 2s single-grain IR laser stimulation at 50°C                       |                                 |
| 4    | 2s single-grain IR laser stimulation at 175°C                      | L <sub>n</sub> , L <sub>i</sub> |
| 5    | Beta test dose                                                     |                                 |
| 6    | 120s cutheat to 200°C                                              |                                 |
| 7    | 2s single-grain IR laser stimulation at 50°C                       |                                 |
| 8    | 2s single-grain IR laser stimulation at 175°C                      | T <sub>n</sub> , T <sub>i</sub> |
| 9    | 300s IR stimulation at 210 °C                                      |                                 |
| 10   | Repeat step 1-10 for a range of doses (incl. zero and repeat dose) |                                 |

**Supplementary Material B. Radial plots of single-grain feldspar pIRIR measurements.**

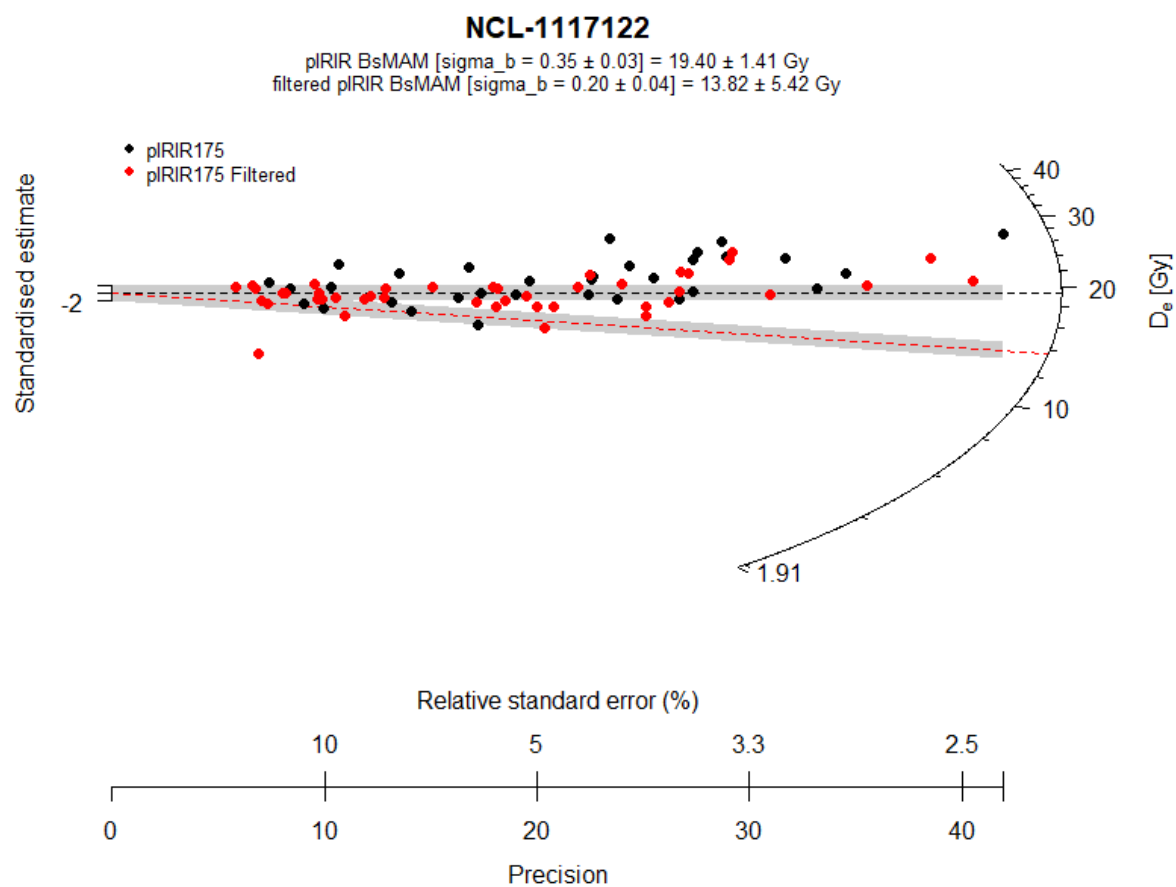

### NCL-1117123

plRIR BsMAM [ $\sigma_b = 0.35 \pm 0.03$ ] =  $12.08 \pm 1.73$  Gy  
filtered plRIR BsMAM [ $\sigma_b = 0.20 \pm 0.04$ ] =  $6.78 \pm 1.30$  Gy

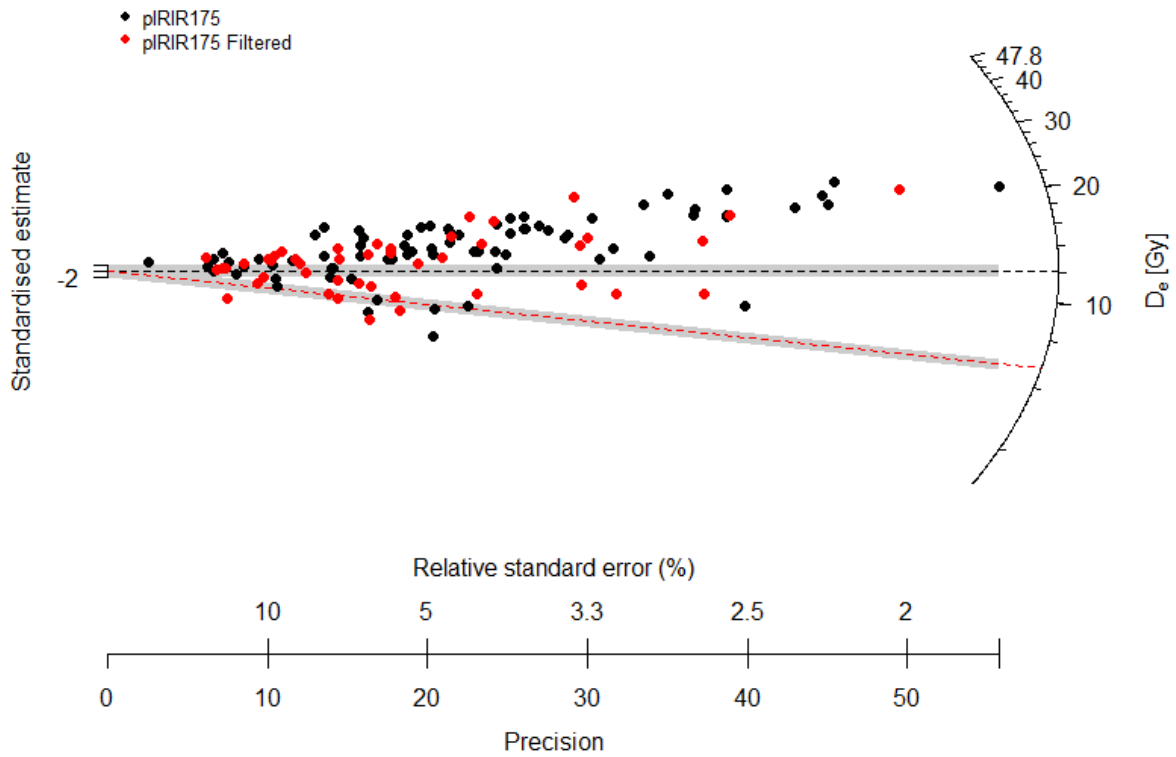

### NCL-1117124

plRIR BsMAM [ $\sigma_b = 0.35 \pm 0.03$ ] =  $3.38 \pm 0.55$  Gy  
filtered plRIR BsMAM [ $\sigma_b = 0.20 \pm 0.04$ ] =  $2.16 \pm 0.40$  Gy

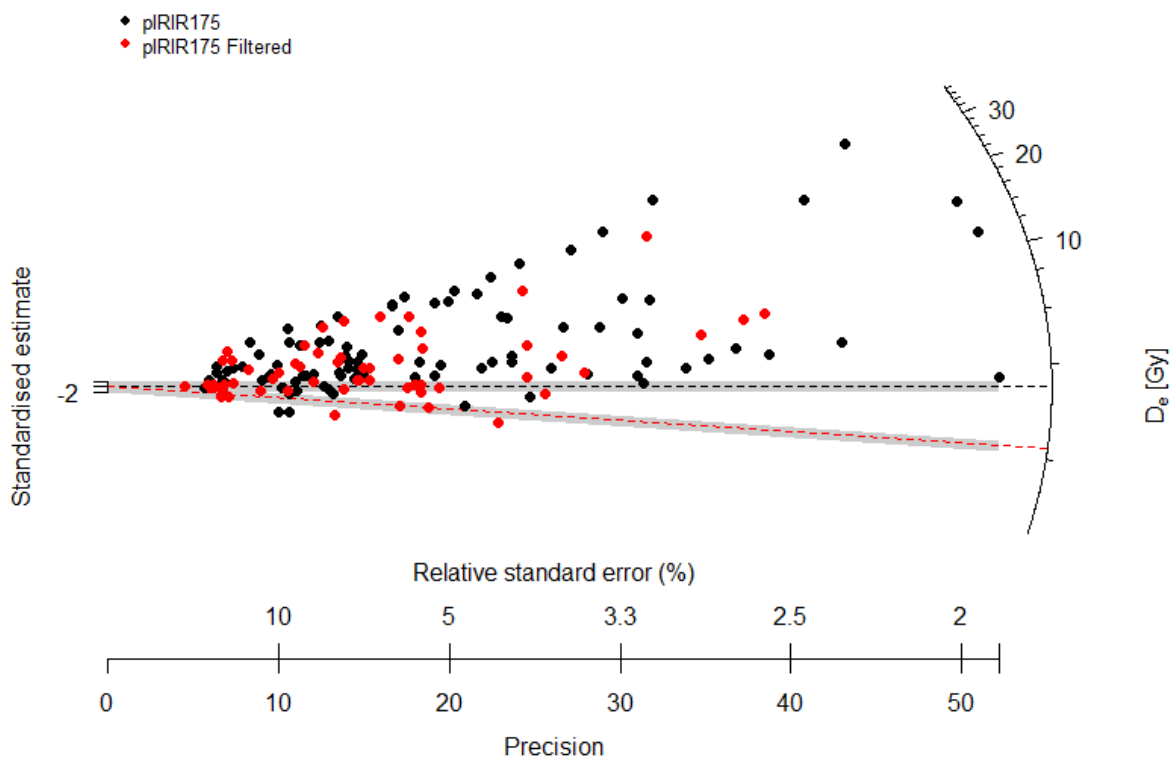

### NCL-1117125

pIRIR BsMAM [ $\sigma_b = 0.35 \pm 0.03$ ] =  $1.49 \pm 0.13$  Gy  
filtered pIRIR BsMAM [ $\sigma_b = 0.20 \pm 0.04$ ] =  $1.46 \pm 0.08$  Gy

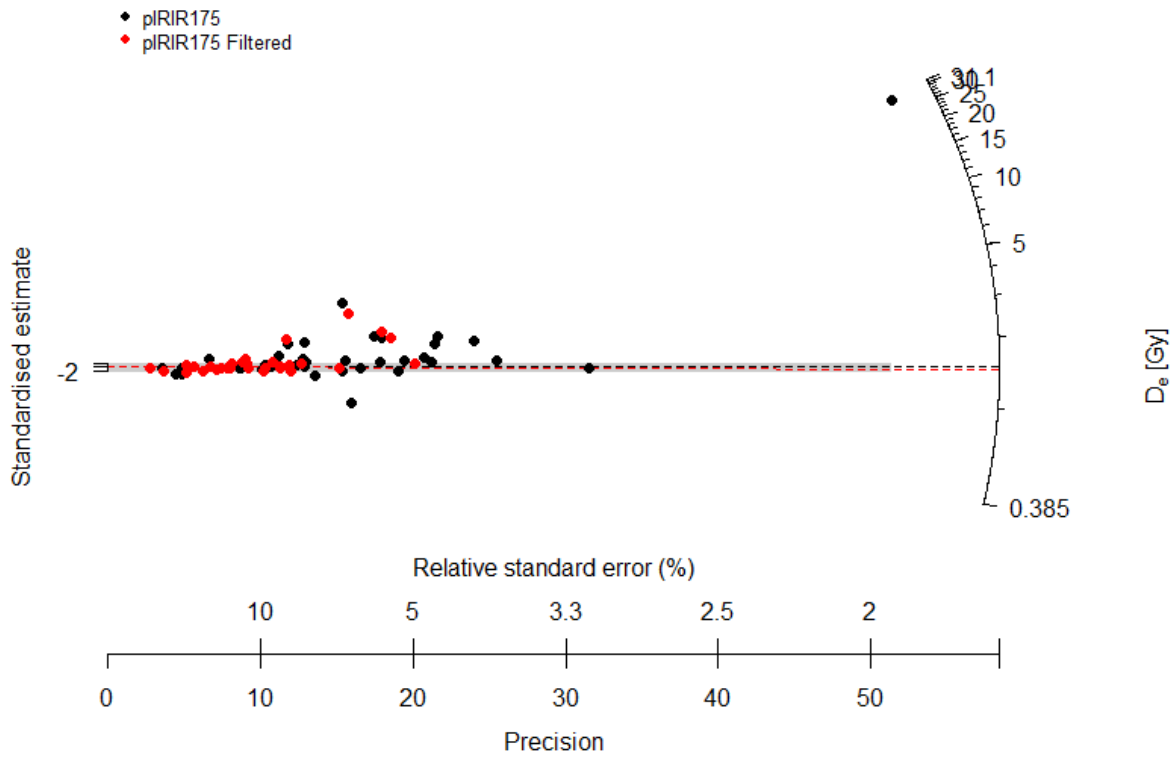

### NCL-1117126

pIRIR BsMAM [ $\sigma_b = 0.35 \pm 0.03$ ] =  $1.51 \pm 0.06$  Gy  
filtered pIRIR BsMAM [ $\sigma_b = 0.20 \pm 0.04$ ] =  $1.31 \pm 0.06$  Gy

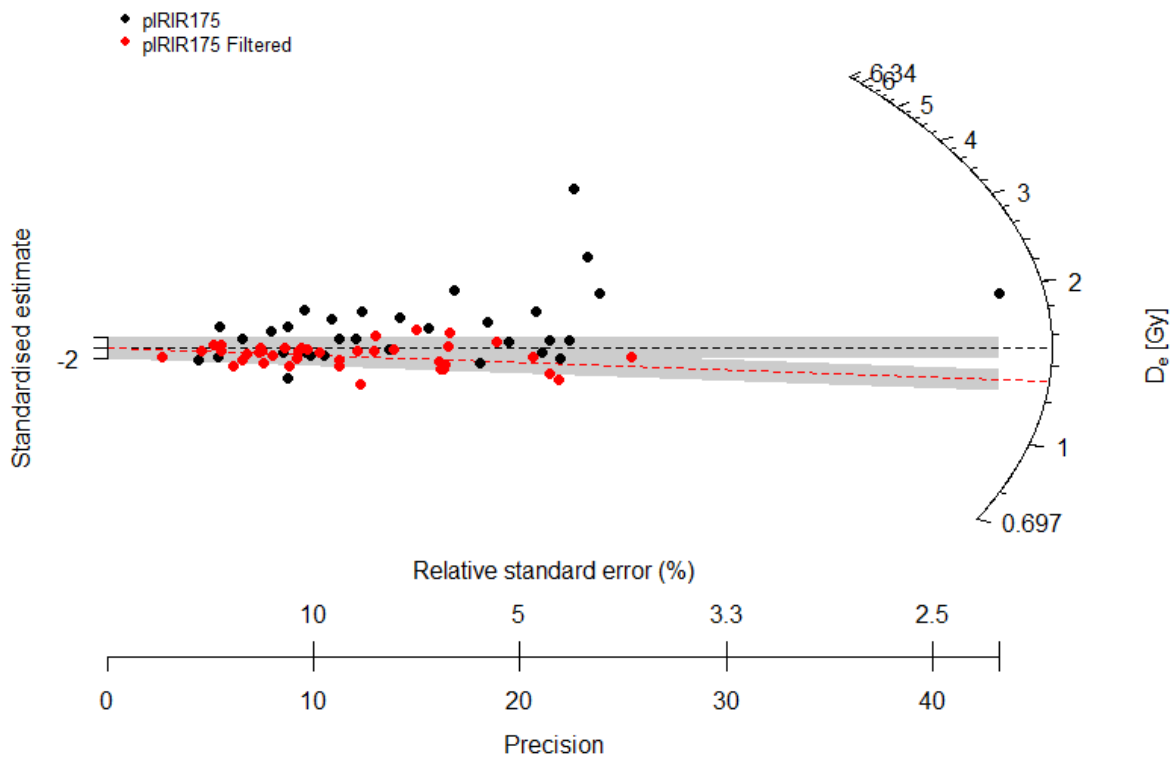

### NCL-1117127

pIRIR BsMAM [ $\sigma_b = 0.35 \pm 0.03$ ] =  $1.15 \pm 0.04$  Gy  
filtered pIRIR BsMAM [ $\sigma_b = 0.20 \pm 0.04$ ] =  $1.07 \pm 0.04$  Gy

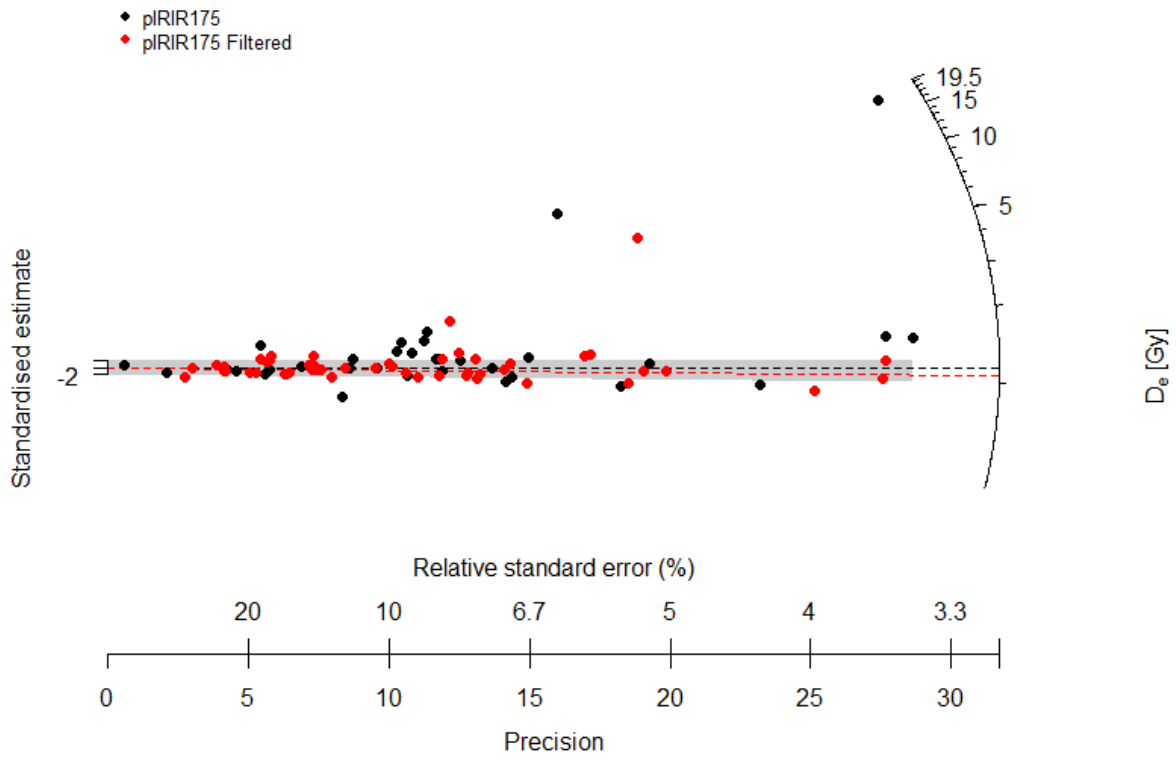

### NCL-1117128

pIRIR BsMAM [ $\sigma_b = 0.35 \pm 0.03$ ] =  $1.09 \pm 0.04$  Gy  
filtered pIRIR BsMAM [ $\sigma_b = 0.20 \pm 0.04$ ] =  $0.89 \pm 0.05$  Gy

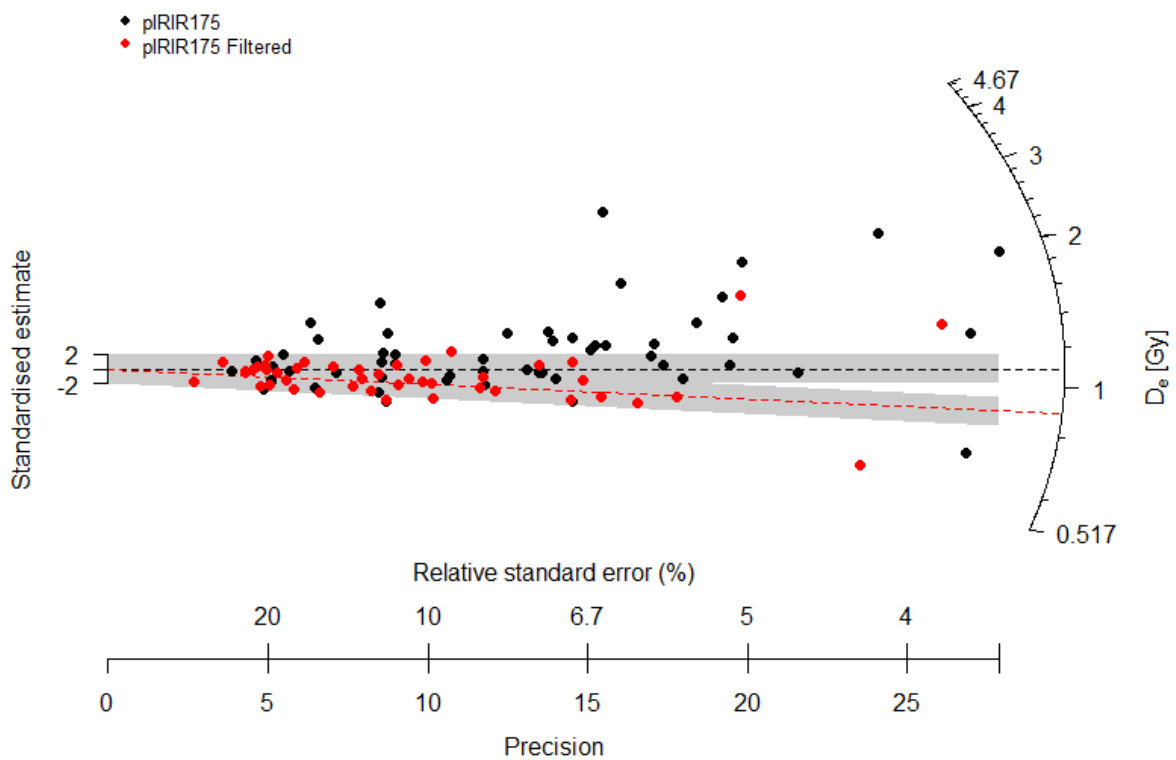

### NCL-1117129

pIRIR BsMAM [ $\sigma_b = 0.35 \pm 0.03$ ] =  $0.88 \pm 0.10$  Gy  
filtered pIRIR BsMAM [ $\sigma_b = 0.20 \pm 0.04$ ] =  $0.54 \pm 0.10$  Gy

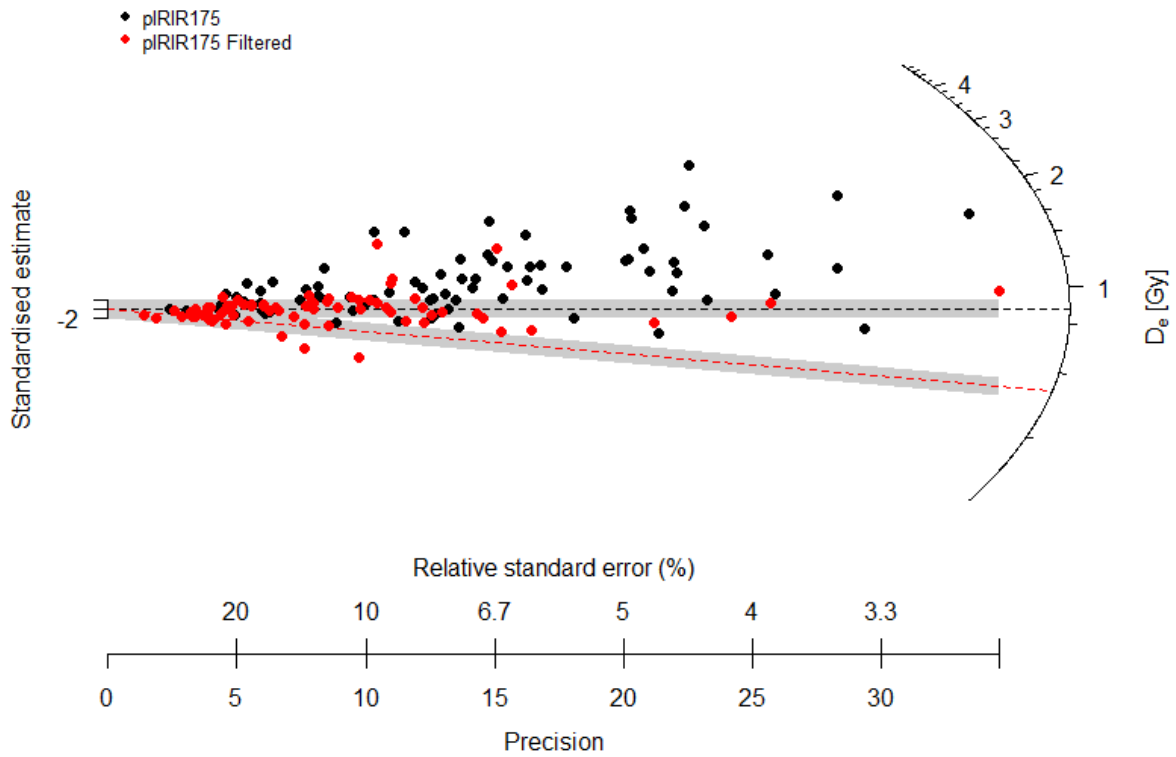

### NCL-1117130

pIRIR BsMAM [ $\sigma_b = 0.35 \pm 0.03$ ] =  $1.09 \pm 0.04$  Gy  
filtered pIRIR BsMAM [ $\sigma_b = 0.20 \pm 0.04$ ] =  $0.77 \pm 0.07$  Gy

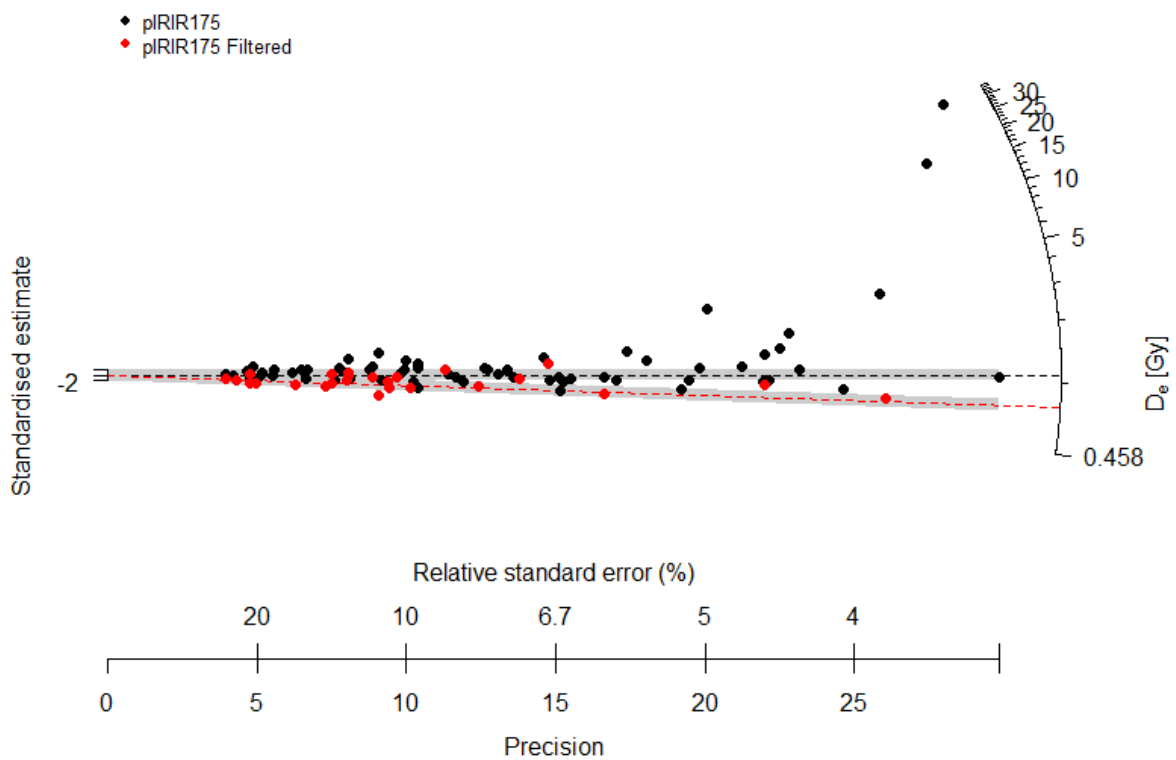

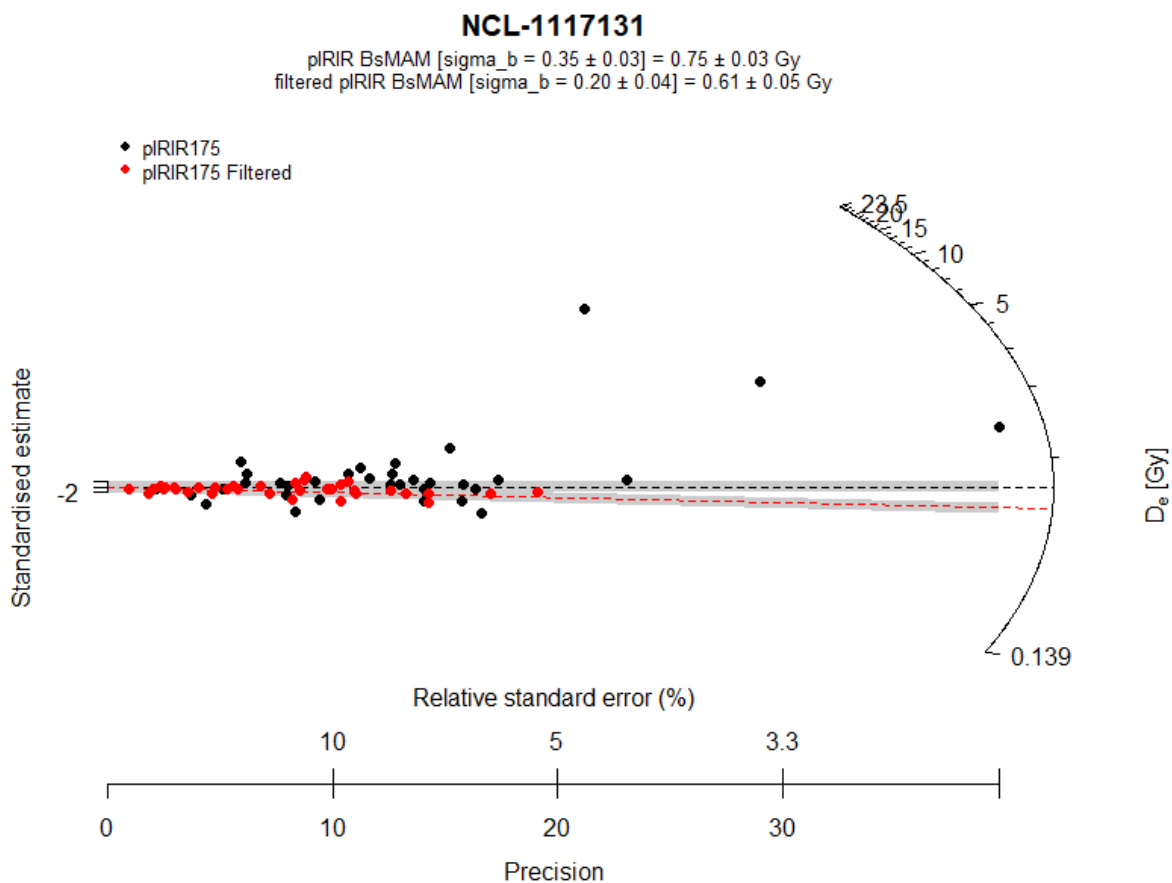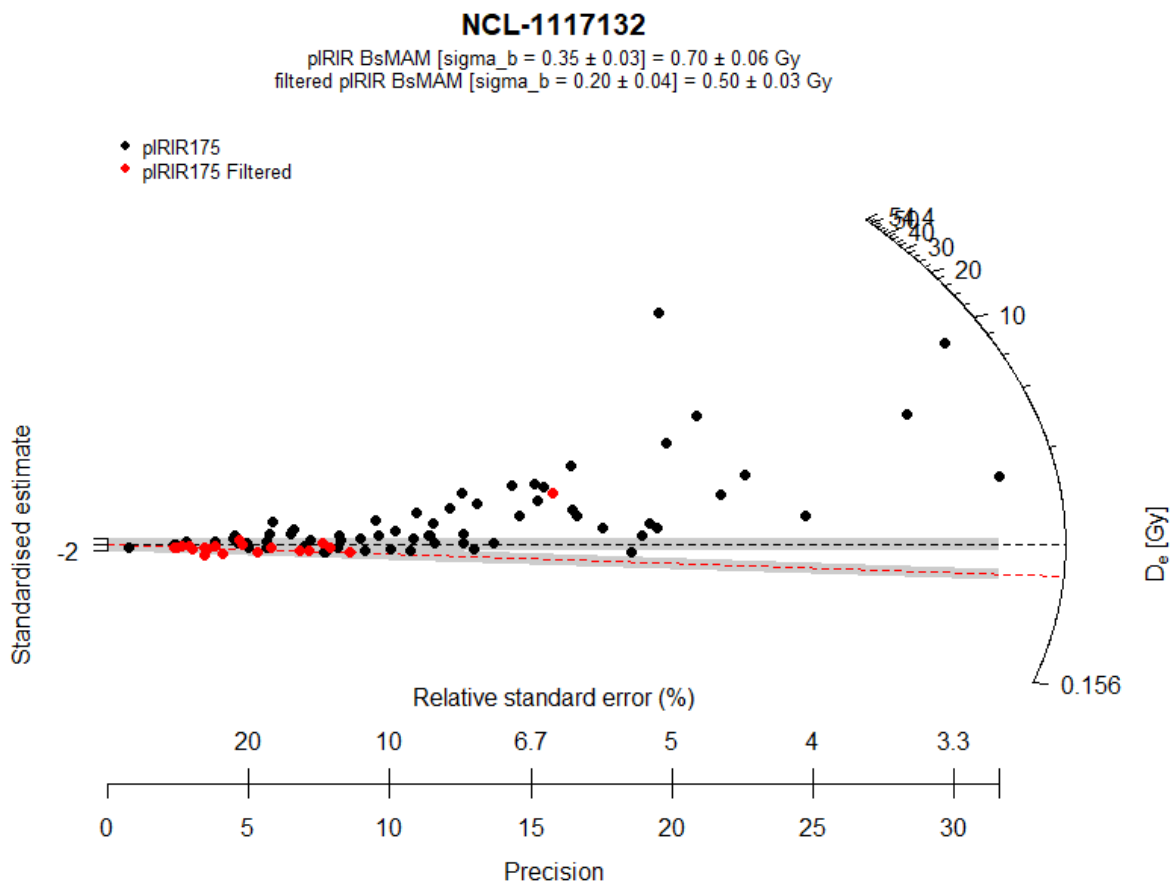

### NCL-1117133

plRIR BsMAM [ $\sigma_b = 0.35 \pm 0.03$ ] =  $0.55 \pm 0.09$  Gy  
 filtered plRIR BsMAM [ $\sigma_b = 0.20 \pm 0.04$ ] =  $0.41 \pm 0.05$  Gy

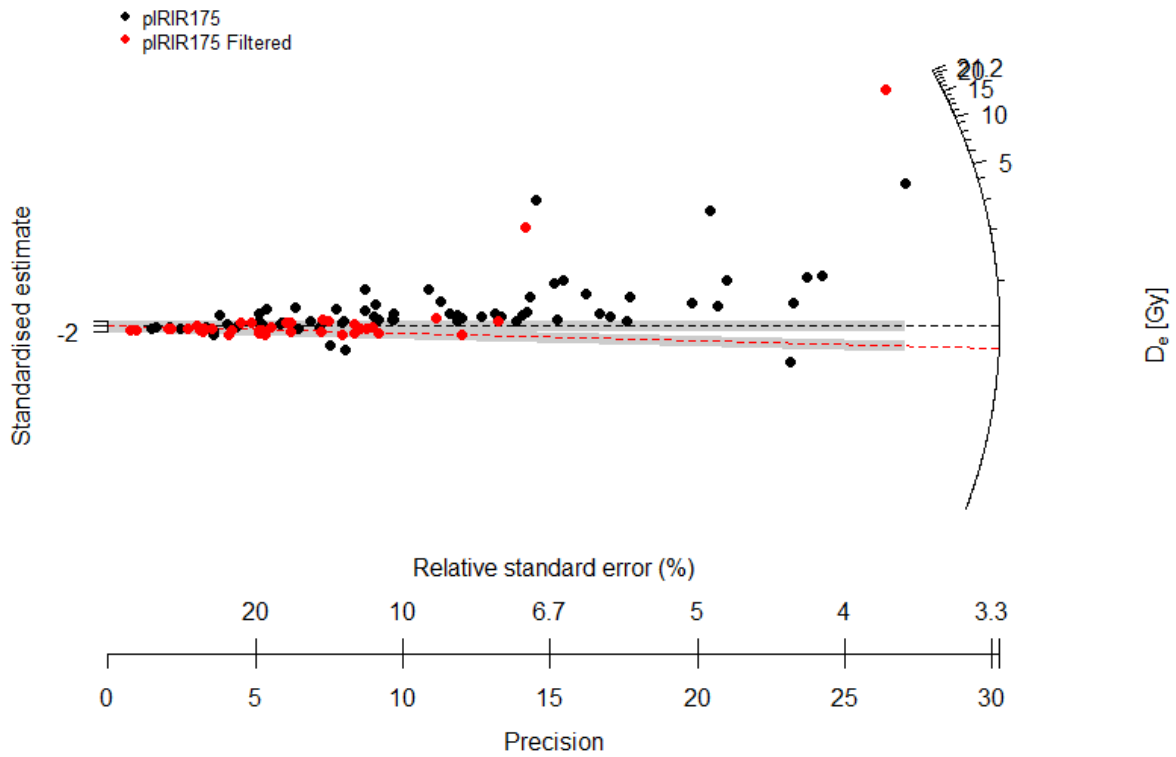

### NCL-1117134

plRIR BsMAM [ $\sigma_b = 0.35 \pm 0.03$ ] =  $0.28 \pm 0.05$  Gy  
 filtered plRIR BsMAM [ $\sigma_b = 0.20 \pm 0.04$ ] =  $0.23 \pm 0.07$  Gy

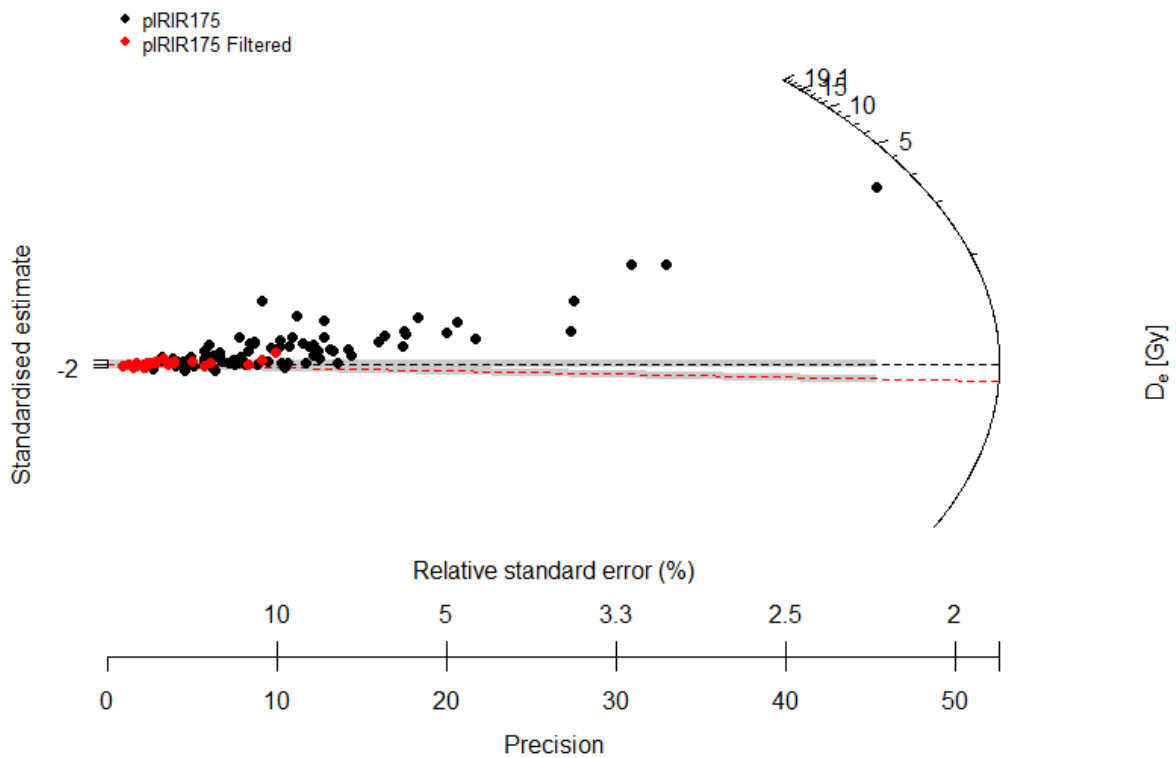

Supplement: Supplementary file 1 [file egusphere-2023-2471-supplement.pdf]
