# Supplementary material for: Luminescence dating approaches to reconstruct the formation of plaggic anthrosols
Source: Copernicus journal article supplement (doi:10.5194/egusphere-2023-2471), 2023-11-08
Supplement: Supplementary file [file egusphere-2023-2471-AC2-supplement.pdf]

| Comments                                                                                                                                                                                                                                                                                                                                                                                                                                                                                                                                                                                        | Responses                                                                                                                                                                                                                                                                                       |
|-------------------------------------------------------------------------------------------------------------------------------------------------------------------------------------------------------------------------------------------------------------------------------------------------------------------------------------------------------------------------------------------------------------------------------------------------------------------------------------------------------------------------------------------------------------------------------------------------|-------------------------------------------------------------------------------------------------------------------------------------------------------------------------------------------------------------------------------------------------------------------------------------------------|
| L147 - are you sure that veneered is the right word? It's beautiful! But it feels not quite right. Maybe 'covered' is better?                                                                                                                                                                                                                                                                                                                                                                                                                                                                   | We agree that the suggested 'covered' would be more straightforward and clear to the readers. We will revise as suggested.                                                                                                                                                                      |
| L160 - I'd like to read more about the location of the pit inside the B. site. It may be important for your interpretation whether the site is right in the middle, on the edge, close to the river, etc.                                                                                                                                                                                                                                                                                                                                                                                       | The pit was dug on the middle of a field plot, which is located on the outer border of a larger area covered with plaggic anthrosols, as shown in Figure 2. The field plot is adjacent to a stream valley, including a tributary of the Dinkel. We shall include this information as commented. |
| L163 - Be clear about which soil classification system you're using also in the text. You're using Dutch classifiers for your horizons (Aap for instance). The FAO system, which I think you should adopt, has different meaning for the lowercase a than the dutch system (see page 72 <a href="https://www.fao.org/3/a0541e/a0541e.pdf">https://www.fao.org/3/a0541e/a0541e.pdf</a> ). Since most readers will know the FAO system but not the dutch system, please either switch to FAO (recommended) or spend some space on explaining what Aap and other codes mean to non-Dutch speakers. | We will provide more detailed description on the suffixes for the readers. We do agree that adopting the FAO system would be most convenient for the readers, but it would be difficult to make direct transition from the Dutch system to the FAO system at this stage.                        |
| L181 I'd appreciate a picture of the tubes inside the pit, with a scale-ribbon. Reference your figure 5 here, or duplicate its right half as your new figure 3. That's less abstract than reading the depths from Table 1.                                                                                                                                                                                                                                                                                                                                                                      | We agree that adding the figure would be useful. We will present the picture along with Table 1, making it Figure 3.                                                                                                                                                                            |
| L210 You mentioned using the Wageningen lab for pre work. Were the readers also there, or in Koeln?                                                                                                                                                                                                                                                                                                                                                                                                                                                                                             | All of the luminescence sample preparations and measurements (incl gamma spectrometry) were performed in Wageningen. We will make it more clear during revision.                                                                                                                                |
| L313 It seems the test results are well documented here in the results. Well done, and appropriate given your first objective. They are results here (otherwise, they might have fitted in your methods).                                                                                                                                                                                                                                                                                                                                                                                       | Thank you.                                                                                                                                                                                                                                                                                      |
| Figure 5: please extend also the top dashed line to the left of the figure                                                                                                                                                                                                                                                                                                                                                                                                                                                                                                                      | We will revise the figure as commented.                                                                                                                                                                                                                                                         |
| L327 can you argue with numbers that there is no clear trend? I see a weak trend that is the opposite of your expectation, which would be interesting/require explanation/speculation if it were significant                                                                                                                                                                                                                                                                                                                                                                                    | We will apply linear regression to the results and see whether there is indeed a trend. We will also add a brief discussion about it in Section 5.1.                                                                                                                                            |
| In Figure 8 and Table 2, can you add a column with years in CE? There may be a standard that calls for years before 2017, but it feels easier to read for a wider audience with years CE as a secondary x-axis or extra column.                                                                                                                                                                                                                                                                                                                                                                 | We will add a column with years in CE as recommended.                                                                                                                                                                                                                                           |
